# Supplementary material for: Interpretable brain disease classification and relevance-guided deep learning
Source: PubMed Central journal article supplement (PMC9691637; doi:10.1038/s41598-022-24541-7), 2022-11-24
Supplement: 41598_2022_24541_MOESM1_ESM.pdf [file 41598_2022_24541_MOESM1_ESM.pdf]

# Interpretable Brain Disease Classification and Relevance-Guided Deep Learning

Christian Tinauer<sup>1</sup>, Stefan Heber<sup>1</sup>, Lukas Pirpamer<sup>1</sup>, Anna Damulina<sup>1</sup>, Reinhold Schmidt<sup>1</sup>, Rudolf Stollberger<sup>2,3</sup>, Stefan Ropele<sup>1,3</sup>, and Christian Langkammer<sup>1,3,\*</sup>

<sup>1</sup>Medical University of Graz, Department of Neurology, Graz, 8036, Austria

<sup>2</sup>Graz University of Technology, Institute of Biomedical Imaging, Graz, 8010, Austria

<sup>3</sup>BioTechMed-Graz, Graz, 8010, Austria

\*christian.langkammer@medunigraz.at

## Appendix A

Table A.1 shows search space and default values for the hyperparameter optimizations for all configurations.

| Hyperparameter                     | Default   | Space                    |
|------------------------------------|-----------|--------------------------|
| learning rate                      | $10^{-4}$ | $\log(10^{-5}, 10^{-3})$ |
| $\gamma$ of learning rate schedule | 0.997     | $\text{lin}(0.96, 1.0)$  |
| $\beta_1$                          | 0.9       | -                        |
| $\beta_2$                          | 0.999     | -                        |
| batch size                         | 8         | -                        |

**Table A.1.** Search space and default values for the hyperparameter optimizations for all configurations.

## Appendix B

Table B.1 shows performance for the different models on all holdout data sets of cross validation.

| Classifier            | Skull stripping | Registration | Cross validation index | Balanced accuracy | Sensitivity | Specificity | AUC  |
|-----------------------|-----------------|--------------|------------------------|-------------------|-------------|-------------|------|
| CNN                   | no              | -            | 1                      | 73.28%            | 54.90%      | 91.67%      | 0.74 |
|                       |                 |              | 2                      | 67.02%            | 48.15%      | 85.90%      | 0.72 |
|                       |                 |              | 3                      | 70.19%            | 49.02%      | 91.36%      | 0.77 |
|                       |                 |              | 4                      | 70.41%            | 56.60%      | 84.21%      | 0.78 |
|                       |                 |              | 5                      | 75.39%            | 69.09%      | 81.69%      | 0.76 |
| CNN                   | no              | lin.         | 1                      | 77.49%            | 64.71%      | 90.28%      | 0.76 |
|                       |                 |              | 2                      | 67.81%            | 57.41%      | 78.21%      | 0.75 |
|                       |                 |              | 3                      | 73.24%            | 58.82%      | 87.65%      | 0.84 |
|                       |                 |              | 4                      | 74.07%            | 54.72%      | 93.42%      | 0.80 |
|                       |                 |              | 5                      | 78.73%            | 80.00%      | 77.46%      | 0.87 |
| CNN                   | no              | nonlin.      | 1                      | 83.62%            | 68.63%      | 98.61%      | 0.92 |
|                       |                 |              | 2                      | 71.94%            | 59.26%      | 84.62%      | 0.78 |
|                       |                 |              | 3                      | 75.93%            | 66.67%      | 85.19%      | 0.80 |
|                       |                 |              | 4                      | 74.64%            | 58.49%      | 90.79%      | 0.83 |
|                       |                 |              | 5                      | 81.93%            | 70.91%      | 92.96%      | 0.91 |
| CNN                   | yes             | -            | 1                      | 80.15%            | 68.63%      | 91.67%      | 0.84 |
|                       |                 |              | 2                      | 70.66%            | 59.26%      | 82.05%      | 0.76 |
|                       |                 |              | 3                      | 78.36%            | 76.47%      | 80.25%      | 0.82 |
|                       |                 |              | 4                      | 75.50%            | 64.15%      | 86.84%      | 0.80 |
|                       |                 |              | 5                      | 83.66%            | 80.00%      | 87.32%      | 0.90 |
| CNN                   | yes             | lin.         | 1                      | 78.35%            | 70.59%      | 86.11%      | 0.89 |
|                       |                 |              | 2                      | 77.14%            | 72.22%      | 82.05%      | 0.80 |
|                       |                 |              | 3                      | 76.98%            | 82.35%      | 71.60%      | 0.81 |
|                       |                 |              | 4                      | 78.81%            | 77.36%      | 80.26%      | 0.86 |
|                       |                 |              | 5                      | 85.98%            | 81.82%      | 90.14%      | 0.93 |
| CNN                   | yes             | nonlin.      | 1                      | 89.09%            | 82.35%      | 95.83%      | 0.93 |
|                       |                 |              | 2                      | 74.07%            | 64.81%      | 83.33%      | 0.79 |
|                       |                 |              | 3                      | 79.99%            | 68.63%      | 91.36%      | 0.85 |
|                       |                 |              | 4                      | 81.99%            | 67.92%      | 96.05%      | 0.93 |
|                       |                 |              | 5                      | 85.48%            | 83.64%      | 87.32%      | 0.90 |
| CNN+Graz <sup>+</sup> | no              | -            | 1                      | 86.32%            | 82.35%      | 90.28%      | 0.92 |
|                       |                 |              | 2                      | 79.06%            | 72.22%      | 85.90%      | 0.88 |
|                       |                 |              | 3                      | 76.03%            | 70.59%      | 81.48%      | 0.81 |
|                       |                 |              | 4                      | 75.50%            | 64.15%      | 86.84%      | 0.84 |
|                       |                 |              | 5                      | 86.39%            | 85.45%      | 87.32%      | 0.93 |
| CNN+Graz <sup>+</sup> | no              | lin.         | 1                      | 92.44%            | 86.27%      | 98.61%      | 0.96 |
|                       |                 |              | 2                      | 89.67%            | 87.04%      | 92.31%      | 0.94 |
|                       |                 |              | 3                      | 75.82%            | 62.75%      | 88.89%      | 0.85 |
|                       |                 |              | 4                      | 83.22%            | 71.70%      | 94.74%      | 0.92 |
|                       |                 |              | 5                      | 89.82%            | 90.91%      | 88.73%      | 0.94 |
| CNN+Graz <sup>+</sup> | no              | nonlin.      | 1                      | 89.79%            | 82.35%      | 97.22%      | 0.93 |
|                       |                 |              | 2                      | 79.13%            | 68.52%      | 89.74%      | 0.89 |
|                       |                 |              | 3                      | 76.54%            | 66.67%      | 86.42%      | 0.84 |
|                       |                 |              | 4                      | 80.78%            | 77.36%      | 84.21%      | 0.88 |
|                       |                 |              | 5                      | 91.23%            | 90.91%      | 91.55%      | 0.94 |
| Log. Repr.*           | yes             | lin.**       | 1                      | 80.31%            | 74.51%      | 86.11%      | 0.89 |
|                       |                 |              | 2                      | 76.50%            | 72.22%      | 80.77%      | 0.86 |
|                       |                 |              | 3                      | 79.34%            | 78.43%      | 80.25%      | 0.85 |
|                       |                 |              | 4                      | 86.16%            | 86.79%      | 85.53%      | 0.94 |
|                       |                 |              | 5                      | 87.71%            | 90.91%      | 84.51%      | 0.95 |

**Table B.1.** Performance (in %) for the different models on all holdout data sets of cross validation.

\*logistic regression by FSL-SIENAX (BET + tissue segmentation)

\*\*linear registration is applied during FSL-SIENAX processing to obtain scaling factor

AUC, area under the curve of the receiver operating characteristics.
